# Supplementary material
Source: PubMed Central journal article supplement (PMC1383636)
Supplement: plntcell_tpc.105.038588_7.pdf [file plntcell_tpc.105.038588_7.pdf]

At2g36890  
At5g23000  
At3g49690  
At5g57620  
At5g65790  
At4g37780  
Sl\_\_Blind

MGRAPCCDKAVKRGPWSPEEAKLKDYEIEKQTGGNWIALPHAGLRRCGKSCRLRWL  
MGRAPCCDKTVKRGPWSPEESKLRDYEIEKYNGGNWISFPLAGLRRCGKSCRLRWL  
MGRAPCCDKAVKKGPWSPEEAKLKSYEIENSTGGNWIALPQIGLKRRCGKSCRLRWL  
MGRAPCCDKAVKKGPWSPEEVKLRDYEIDKYTGGNWIALPQIGLKRRCGKSCRLRWL  
MGRAPCCDKAVKKGPWSPEEAKLKDYEIENSTGGNWIALPQIGLRRCGKSCRLRWL  
MA.....VKKGPWSTEEAVLKSYEIEKHTGNNWISLPQIGIKRCGKSCRLRWL  
MGRAPCCDKAVKRGPWSPEEAKLKDFIHKFTAGNWIALPQAGLRRCGKSCRLRWL

At2g36890  
At5g23000  
At3g49690  
At5g57620  
At5g65790  
At4g37780  
Sl\_\_Blind

NYLRPIRHGDFTEEENI IYSLFASISRWSVIAAHLGRTDNDIKNYWNTKLLKKKLI  
NYLRPIKHGDFSEEERIIFSLFAAISRWSIIAAHLGRTDNDIKNYWNTKLLRKKLL  
NYLRPIKHGGFSEEENIICSLYLTISRWSIIAAQLGRTDNDIKNYWNTRLKKKLI  
NYLRPIKHGGFSEEERIILSLYISISRWSIIAAQLGRTDNDIKNYWNTKLLKKKLL  
NYLRPIKHGGFSEEENIICNLYVTISRWSIIAAQLGRTDNDIKNYWNTRLKKKLL  
NYLRPLKHGGFTDEEYIICSLYITISRWSIIASQLGRTDNDIKNYWNTRLKKKLL  
NYLRPIKHGDFSDDERVICNLYANISRWSIIAAQLGRTDNDIKNYWNTKLLKKKLM
