# Supplementary material
Source: PubMed Central journal article supplement (PMC1383636)

## Flower number in wild type, rax1-1D/+ and rax1-2 plants

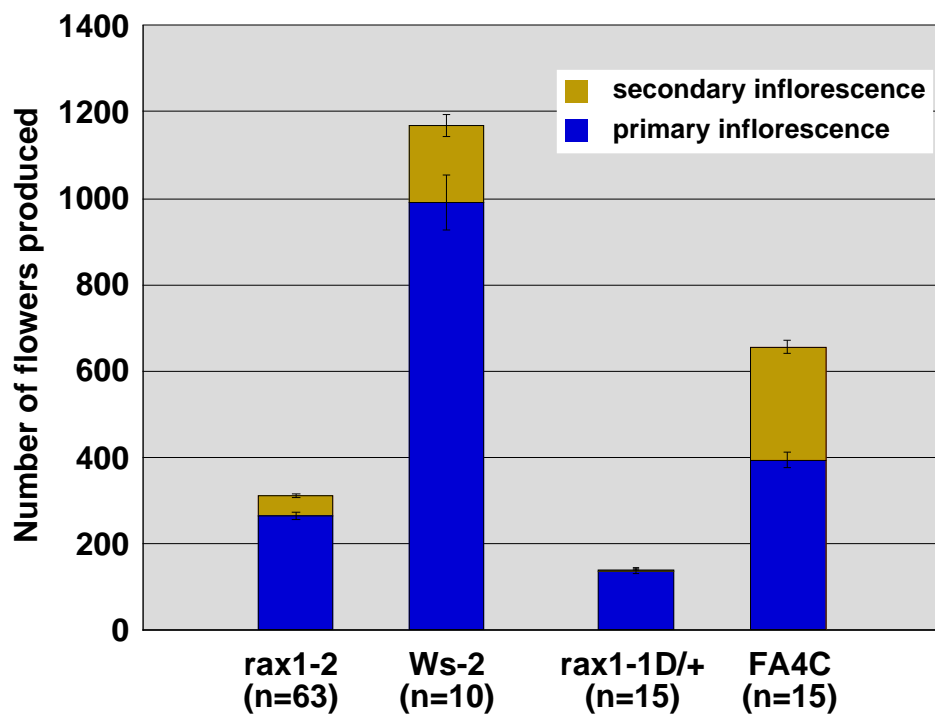

Supplement: plntcell_tpc.105.038588_1.pdf [file plntcell_tpc.105.038588_1.pdf]

**RAX1 is ectopically expressed in rax1-1D/+ leaves**

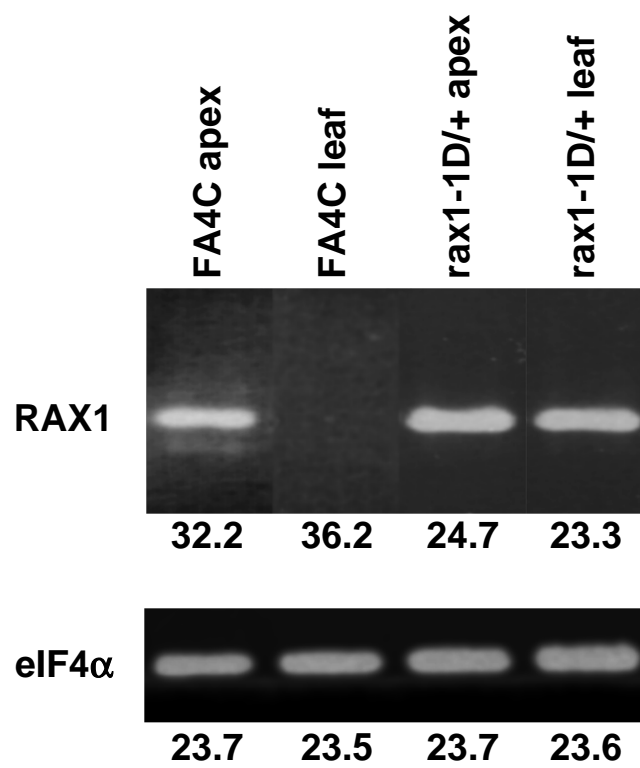

Supplement: plntcell_tpc.105.038588_2.pdf [file plntcell_tpc.105.038588_2.pdf]

## RAX1 transcripts do not accumulate in rax1-2

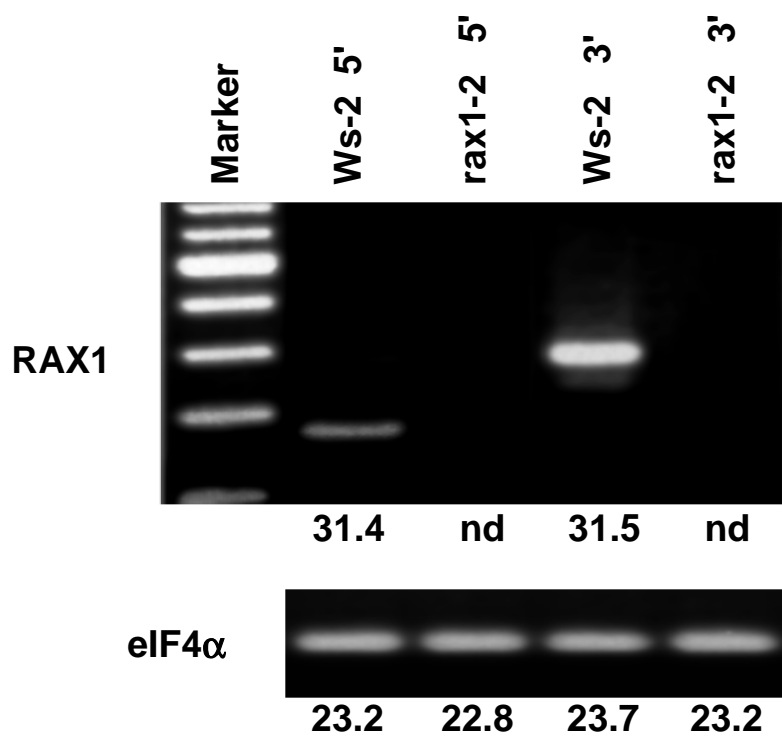

Supplement: plntcell_tpc.105.038588_3.pdf [file plntcell_tpc.105.038588_3.pdf]

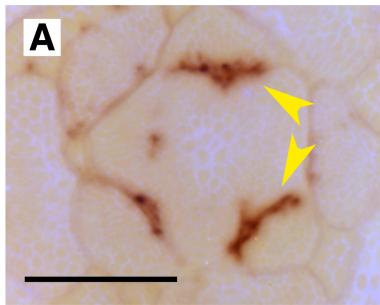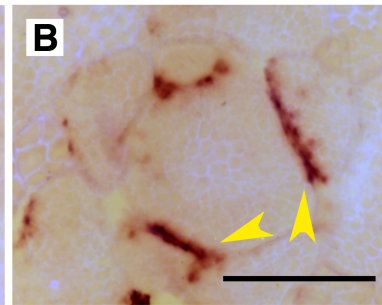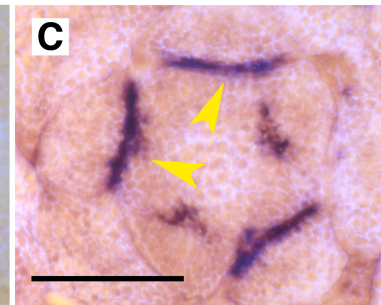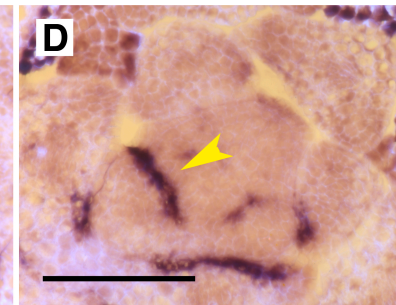

Supplement: plntcell_tpc.105.038588_4.pdf [file plntcell_tpc.105.038588_4.pdf]

**The juvenile phase of vegetative development is not altered in rax1 mutants**

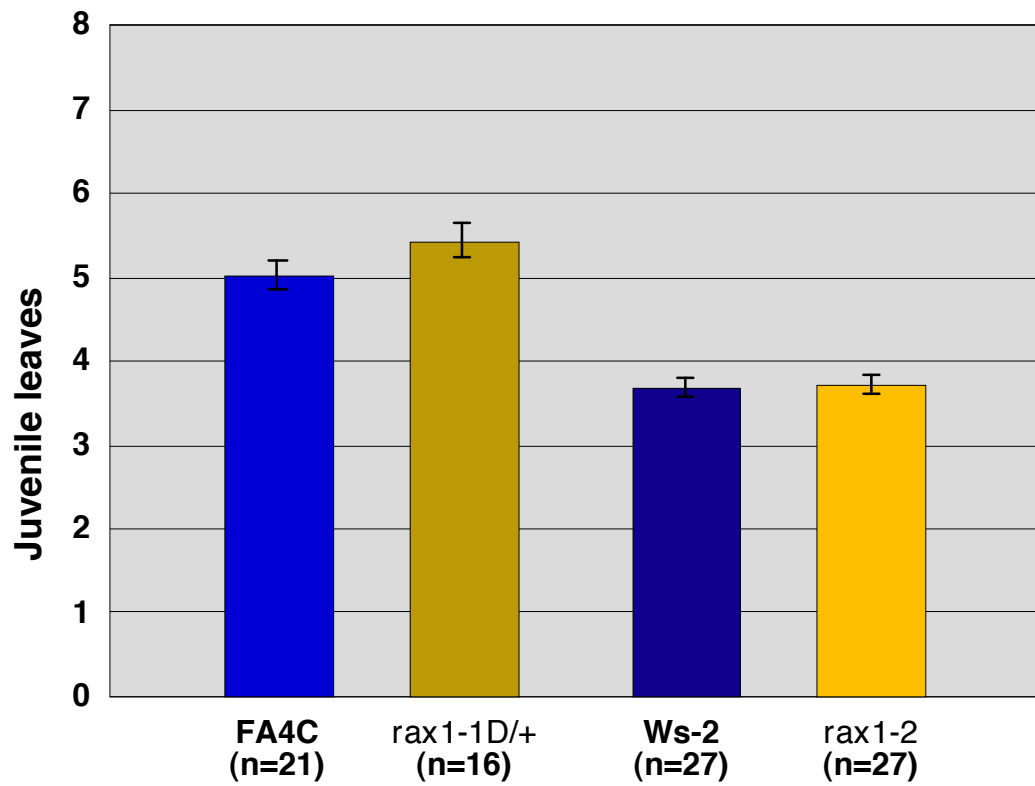

Supplement: plntcell_tpc.105.038588_5.pdf [file plntcell_tpc.105.038588_5.pdf]

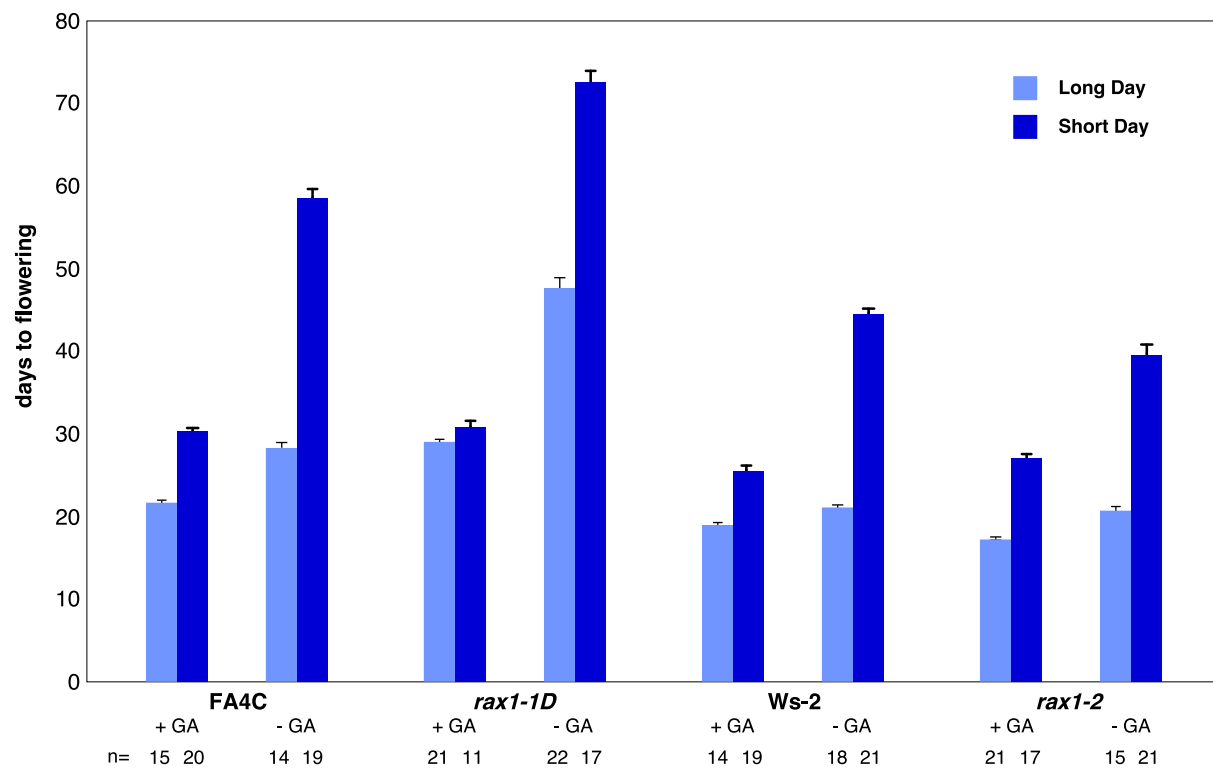

Supplement: plntcell_tpc.105.038588_6.pdf [file plntcell_tpc.105.038588_6.pdf]
